# Supplementary material for: Dependence of electromagnetic interference shielding ability of conductive polymer composite foams with hydrophobic properties on cellular structure
Source: Royal Society of Chemistry journal article supplement (doi:10.1039/d0tc00987c), 2020-01-01
Supplement: d0tc00987c2.pdf [file d0tc00987c2.pdf]

# **Dependence of electromagnetic interference shielding ability of conductive polymer composite foams with hydrophobic properties on cellular structure**

Biao Zhao <sup>a, b, c</sup>, Ruoming Wang <sup>a</sup>, Yang Li <sup>d</sup>, Yumei Ren <sup>a</sup>, Xiao Li <sup>b</sup>, Xiaoqin Guo <sup>a</sup>,  
Rui Zhang <sup>a, d</sup>, Chul B. Park <sup>c, \*</sup>

<sup>a</sup> Henan Key Laboratory of Aeronautical Materials and Application Technology, School of Material Science and Engineering, Zhengzhou University of Aeronautics, Zhengzhou, Henan 450046, PR China

<sup>b</sup> Laboratory of Advanced Materials, Department of Materials Science, Collaborative Innovation Center of Chemistry for Energy Materials, Fudan University, Shanghai 200438, China

<sup>c</sup> Microcellular Plastics Manufacturing Laboratory, Department of Mechanical and Industrial Engineering, University of Toronto, 5 King's College Road, Toronto M5S 3G8, Canada

<sup>d</sup> School of Material Science and Engineering, Zhengzhou University, Zhengzhou, Henan 450001, PR China

***Corresponding Author:***

Prof. Chul B. Park

E-mail: park@mie.utoronto.ca

Tel: +1- 416-978-3053

Fax: +1- 416-978-0947.

## Experimental Section

### Raw materials

The PVDF (molecular weight 300 000 – 330 000 g/mol) was provided by Solvay. *N,N*-dimethylformamide (DMF) was supplied by Caledon Laboratories Ltd. *N,N*-dimethylformamide (DMF) was supplied by Caledon Laboratories Ltd. Multi-walled carbon nanotubes (MWCNT, NC7000™) (average outer diameter: 9.5 nm, average length: 1.5 microns, surface area: 250-300 m<sup>2</sup>/g, carbon purity 90%) were supplied by Nanocyl™, Belgium and were fabricated by means of a Catalytic Chemical Vapor Deposition (CCVD) process. Carbon dioxide (CO<sub>2</sub>) with purity of 99.98% was purchased from Linde gas. PVDF/MWCNT composite foams were prepared through a batch foaming system developed in-house (as shown in Figure S1).

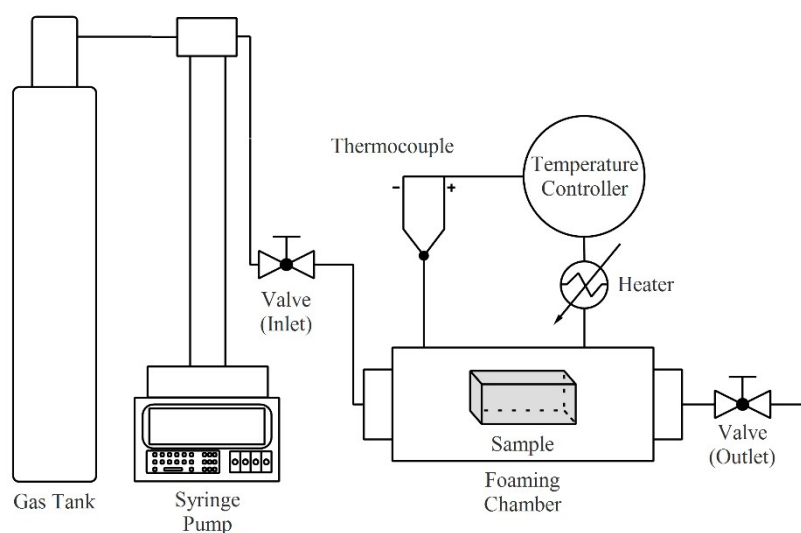

**Figure S1.** A home-made batch foaming equipment to fabricate PVDF/MWCNT composite foams.

### Characterization

X-ray radiation diffraction (XRD), which was collected by a Rigaku Smart Lab (Tokyo, Japan) diffractometer using Cu K $\alpha$  radiation ( $\lambda=0.15418$  nm), was used to analyze the crystal structure. The characteristic vibrational modes were analyzed using Fourier Transform Infrared Spectroscopy (FTIR), which was performed on a Nicolet iS10 FTIR spectrometer (USA). To obtain the cell size and the void fraction, the samples were cryo-fractured and the microstructures were observed using a JEOL JSM-

6060 scanning electron microscope (SEM). The densities of the solid ( $\rho_s$ ) and the foam ( $\rho_f$ ) composites were studied based on the water-displacement method (ASTM D792-13). The void fraction ( $VF$ ) was calculated as  $VF = 1 - \rho_f/\rho_s$ .<sup>1</sup> The electrical conductivity of carbon foams was investigated using an RTS-9 type double electric test four probe tester (China Guangzhou Four Probe Technology Co., Ltd.).

The EMI SE ( $SE_T$ ) was tested in a frequency range of 26.5 - 40 GHz (Ka-band) at room temperature using a vector network analyzer (VNA, Agilent N5234A). The VNA was calibrated before the S scattering parameters were measured. Samples were cut into  $\sim 7.1 \text{ mm} \times 3.5 \text{ mm}$  (length  $\times$  width) pieces to perfectly fit the waveguide holders. The EMI SE ( $SE_T$ ), the ability of the material to shield an electronic device from electromagnetic radiation, was obtained from the following equation:<sup>2-5</sup>

$$SE_T \text{ (dB)} = 10 \log_{10} \left( \frac{P_I}{P_T} \right) \quad (1)$$

where  $P_I$  is the incident power and  $P_T$  is the transmitted power. Popularly, electromagnetic waves are dissipated by three mechanisms: absorption ( $SE_A$ ), reflection ( $SE_R$ ) and multiple reflections ( $SE_M$ ). The  $SE_M$  is omitted when EMI SE is above 15 dB, that is,  $SE_T$  can be simplified as:

$$SE_T = SE_R + SE_A \quad (2)$$

In the two-port vector network analyzer,  $SE_T$  can be determined through the calculation of reflectance ( $R$ ), transmittance ( $T$ ) and absorbance ( $A$ ) coefficients, which can be deduced from scattering parameters ( $S_{11}$ ,  $S_{12}$ ,  $S_{21}$ ,  $S_{22}$ ) as follows:

$$R = |S_{11}|^2 = |S_{22}|^2 \quad (3)$$

$$T = |S_{21}|^2 = |S_{12}|^2 \quad (4)$$

$$SE_R = -10 \log_{10} (1 - R) \quad (5)$$

$$SE_A = -10 \log_{10} \left( \frac{T}{1 - R} \right) \quad (6)$$

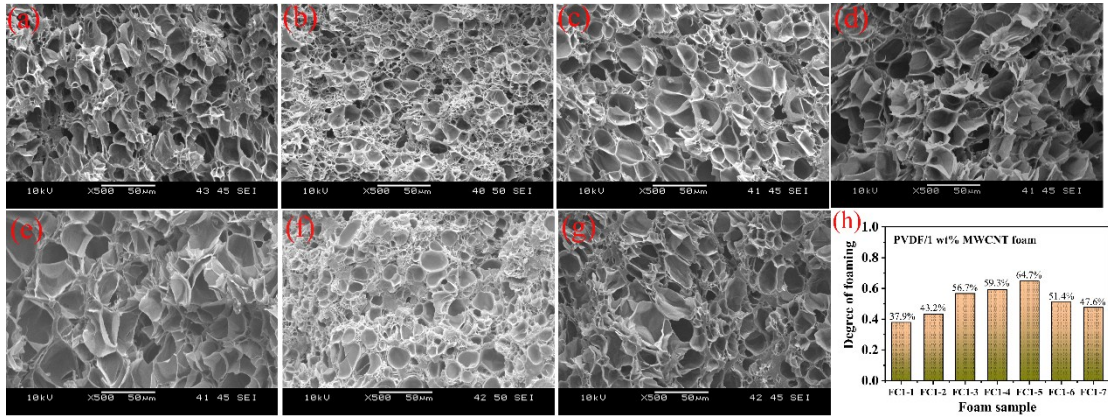

**Figure S2.** SEM images of cryo-fractured FC1 nanocomposite foams: (a) FC1-1, (b) FC1-2, (c) FC1-3, (d) FC1-4, (e) FC1-5, (f) FC1-6 and (g) FC1-7 samples. (h) Various FC1 foams' degree of foaming.

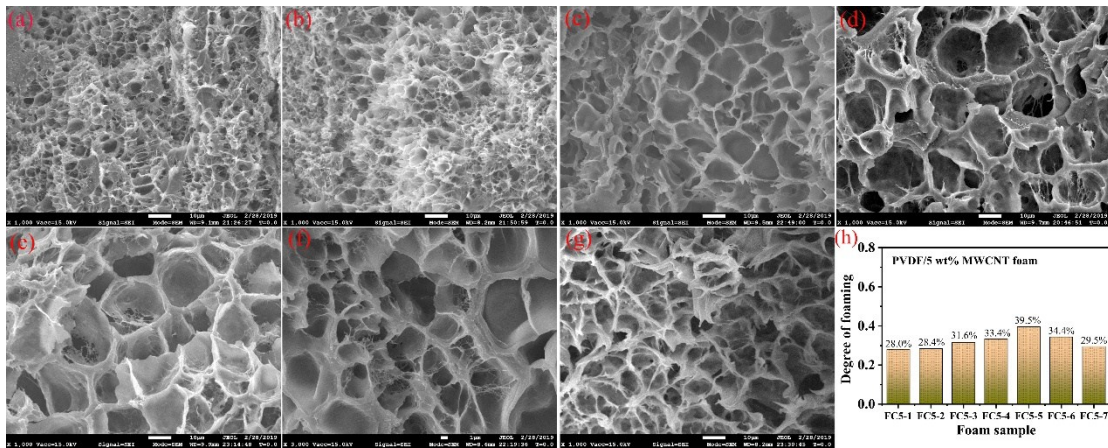

**Figure S3.** SEM images of cryo-fractured FC5 nanocomposite foams: (a) FC5-1, (b) FC5-2, (c) FC5-3, (d) FC5-4, (e) FC5-5, (f) FC5-6 and (g) FC5-7 samples. (h) Various FC5 foams' degree of foaming.

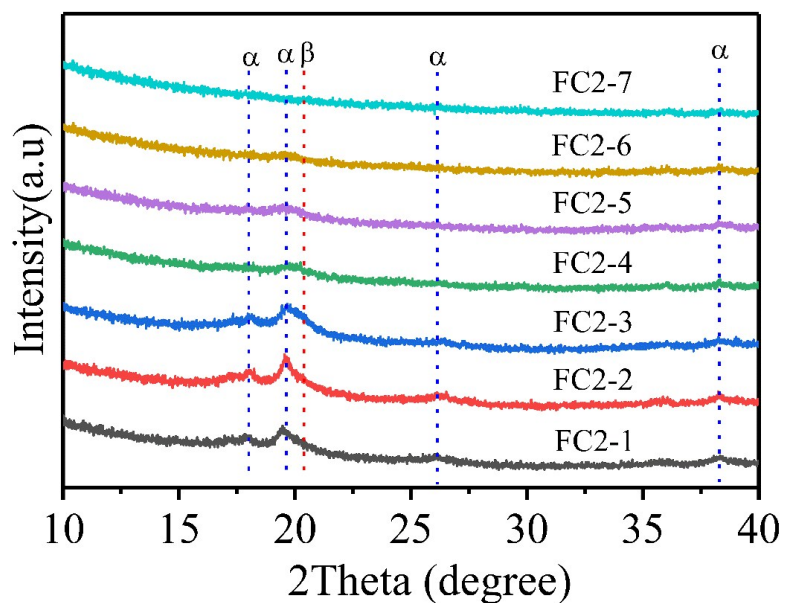

**Figure S4.** XRD patterns of FC2 nanocomposite foams prepared at different impregnation temperatures.

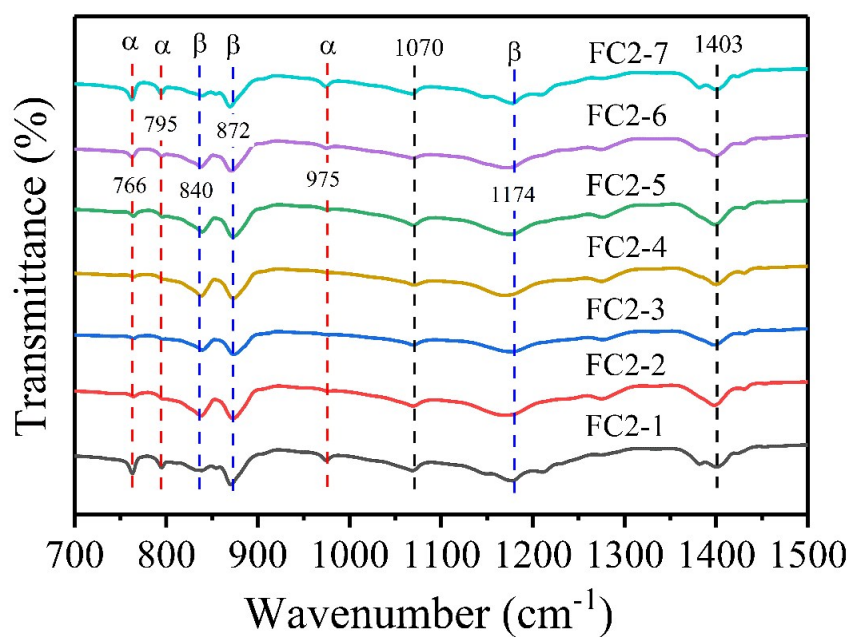

**Figure S5.** FT-IR spectra of FC2 nanocomposite foams prepared at different impregnation temperatures.

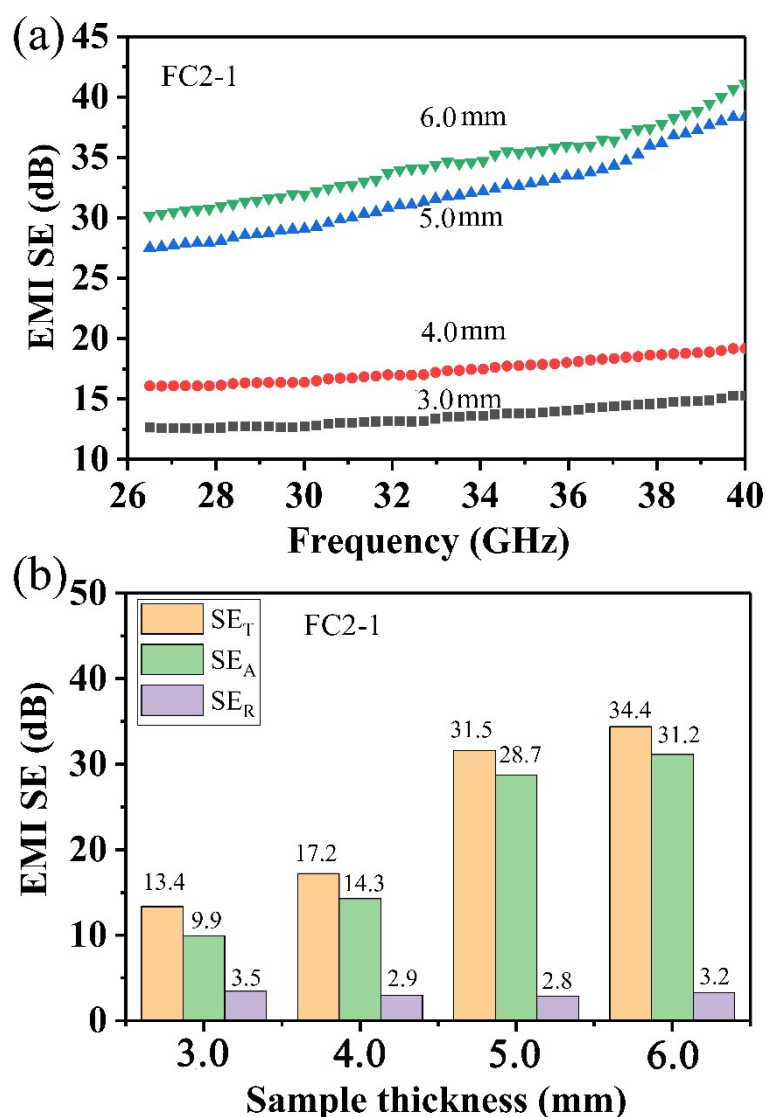

**Figure S6.** (a) EMI SE in the Ka-band (26.5-40 GHz) of the FC2-1 foam (28.0 % degree of foaming) at different thicknesses; (b) average  $SE_T$ ,  $SE_R$ , and  $SE_A$  values of the FC2-1 foam (28.0 % degree of foaming) at different thicknesses.

#### References:

1. J. W. S. Lee, R. E. Lee, J. Wang, P. U. Jung and C. B. Park, *Chemical Engineering Science*, 2017, **167**, 105-119.
2. Y. Li, B. Shen, X. Pei, Y. Zhang, D. Yi, W. Zhai, L. Zhang, X. Wei and W. Zheng, *Carbon*, 2016, **100**, 375-385.
3. C. Li, C. Zhou, J. Lv, B. Liang, R. Li, Y. Liu, J. Hu, K. Zeng and G. Yang, *Carbon*, 2019, **149**, 190-202.
4. L.-C. Jia, G. Zhang, L. Xu, W.-J. Sun, G.-J. Zhong, J. Lei, D.-X. Yan and Z.-M. Li, *ACS Applied Materials & Interfaces*, 2019, **11**, 1680-1688.
5. B. Zhao and C. B. Park, *Journal of Materials Chemistry C*, 2017, **5**, 6954-6961.
